# Supplementary material for: Is There a Bidirectional Association between Polycystic Ovarian Syndrome and Periodontitis? A Systematic Review and Meta-analysis
Source: PubMed Central journal article supplement (PMC7355910; doi:10.3390/jcm9061961), 2020-06-23
Supplement: jcm-09-01961-s001.pdf [file jcm-09-01961-s001.pdf]

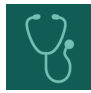

Review

# Is There a Bidirectional Association between Polycystic Ovarian Syndrome and Periodontitis? A Systematic Review and Meta-analysis

Vanessa Machado <sup>1,\*</sup>, Cláudia Escalda <sup>1</sup>, Luís Proença <sup>2</sup>, José João Mendes <sup>1</sup> and João Botelho <sup>1</sup>

<sup>1</sup> Clinical Research Unit (CRU), Centro de Investigação Interdisciplinar Egas Moniz (CiiEM), Instituto Universitário Egas Moniz (IUEM), 2829-511 Caparica, Portugal; claudia.escalda4@gmail.com (C.E.); jmendes@egasmoniz.edu.pt (J.J.M.); jbotelho@egasmoniz.edu.pt (J.B.)

<sup>2</sup> Quantitative Methods for Health Research (MQIS), Centro de Investigação Interdisciplinar Egas Moniz (CiiEM), Instituto Universitário Egas Moniz (IUEM), 2829-511 Caparica, Portugal; lproenca@egasmoniz.edu.pt

\* Correspondence: vmachado@egasmoniz.edu.pt

## Supplementary material

Table 1. List of excluded articles

|      | Number | Reference                                                                                                                                                                                                                                                                                                                                                      | Reason for exclusion   |
|------|--------|----------------------------------------------------------------------------------------------------------------------------------------------------------------------------------------------------------------------------------------------------------------------------------------------------------------------------------------------------------------|------------------------|
| 2019 | 1      | Varghese, Arun, A. Julie Christy, B. Pratheeba, P. Saraswathy, and Sumathy Ravi. "Salivary Interleukin-6 Levels among Polycystic Ovary Syndrome (Pcos) Patients with and Without Chronic Periodontitis-A Comparitive Study." <i>International Journal of Innovative Research in Medical Science</i> 4, no. 09 (2019): 534-to.                                  | Unrelated group        |
| 2017 | 2      | Deepti, Tewari S, Narula SC, Singhal SR, Sharma RK. Effect of Non-Surgical Periodontal Therapy Along With Myo-Inositol on High-Sensitivity C-Reactive Protein and Insulin Resistance in Women With Polycystic Ovary Syndrome and Chronic Periodontitis: A Randomized Controlled Trial. <i>J Periodontol.</i> 2017;88(10):999–1011. doi:10.1902/jop.2017.170121 | No control group       |
| 2017 | 3      | Akcalı A, Bostanci N, Özçaka Ö, et al. Gingival Inflammation and Salivary or Serum Granulocyte-Secreted Enzymes in Patients With Polycystic Ovary Syndrome. <i>J Periodontol.</i> 2017;88(11):1145–1152. doi:10.1902/jop.2017.170043                                                                                                                           | No periodontitis group |
| 2017 | 4      | Nair SD, Varma S, Suragimath G, et al. Prevalence of periodontal disease in women with polycystic ovary syndrome- A comparative descriptive study. <i>J. Evolution Med. Dent. Sci.</i> 2017;6(65):4733-4736, DOI:10.14260/Jemds/2017/1025                                                                                                                      | Sample size bias       |
| 2015 | 5      | Akcalı, A., Bostanci, N., Özçaka, Ö., Öztürk-Ceyhan, B., Gümüş, P., Tervahartiala, T., Husu, H., Buduneli, N., Sorsa, T., & Belibasakis, G. N. (2015). Elevated matrix metalloproteinase-8 in saliva and serum in polycystic ovary syndrome and association with gingival inflammation. <i>Innate</i>                                                          | No periodontitis group |

|      |   |                                                                                                                                                                                                                                                                                                                                        |                 |
|------|---|----------------------------------------------------------------------------------------------------------------------------------------------------------------------------------------------------------------------------------------------------------------------------------------------------------------------------------------|-----------------|
|      |   | immunity, 21(6), 619–625.<br><a href="https://doi.org/10.1177/1753425915572172">https://doi.org/10.1177/1753425915572172</a>                                                                                                                                                                                                           |                 |
| 2014 | 6 | Asnani, K. P., Hingorani, D., Kheur, S., Deshmukh, V., & Romanos, G. E. (2014). Expression of nuclear receptors of gingiva in polycystic ovarian syndrome: a preliminary case study. <i>Australian dental journal</i> , 59(2), 252–257.<br><a href="https://doi.org/10.1111/adj.12176">https://doi.org/10.1111/adj.12176</a>           | Case report     |
| 2012 | 7 | Özçaka, Ö., Ceyhan, B. Ö., Akcali, A., Biçakci, N., Lappin, D. F., & Buduneli, N. (2012). Is there an interaction between polycystic ovary syndrome and gingival inflammation?. <i>Journal of periodontology</i> , 83(12), 1529–1537.<br><a href="https://doi.org/10.1902/jop.2012.110588">https://doi.org/10.1902/jop.2012.110588</a> | Repeated sample |

**Table 2.** Case-control studies bias assessment using the Newcastle-Ottawa Scale (NOS)

| Study.                  | SELECTION                        |                                  |                        |                         | COMPARABILITY                                              | EXPOSURE                   |                                        |                    | RoB Score |
|-------------------------|----------------------------------|----------------------------------|------------------------|-------------------------|------------------------------------------------------------|----------------------------|----------------------------------------|--------------------|-----------|
|                         | Is the case definition adequate? | Representativeness of the cases? | Selection of controls? | Definition of controls? | Comparability of cases and controls of design or analysis? | Ascertainment of exposure? | Same method of ascertainment for cases | Non-response rate? |           |
| Dursun et al. 2011      | a                                | b                                | c                      | a                       | a/b                                                        | a                          | a                                      | a                  | 7         |
| Ozçaka et al. 2013      | a                                | a                                | a                      | b                       | a/b                                                        | a                          | a                                      | a                  | 8         |
| Porwal et al. 2014      | a                                | a                                | a                      | a                       | a/b                                                        | a                          | a                                      | a                  | 9         |
| Akcali et al. 2014      | a                                | b                                | a                      | a                       | a/b                                                        | a                          | a                                      | a                  | 8         |
| Rahiminejad et al. 2015 | a                                | a                                | a                      | b                       | a/b                                                        | a                          | a                                      | a                  | 8         |
| Hameed et al. 2017      | a                                | b                                | a                      | a                       | a/b                                                        | a                          | a                                      | a                  | 8         |
| Najah et al. 2017       | a                                | b                                | a                      | a                       | a/b                                                        | a                          | a                                      | a                  | 8         |
| Saglam et al. 2018      | a                                | b                                | a                      | a                       | a/b                                                        | a                          | a                                      | a                  | 8         |
| Tong et al. 2019        | b                                | a                                | a                      | b                       | a/b                                                        | a                          | a                                      | a                  | 7         |
| Varadan et al. 2019     | a                                | a                                | a                      | a                       | a/b                                                        | a                          | a                                      | a                  | 9         |
| Isik et al. 2020        | a                                | a                                | a                      | a                       | a/b                                                        | a                          | a                                      | a                  | 9         |
| Saljoughi et al. 2020   | a                                | a                                | a                      | a                       | a/b                                                        | a                          | a                                      | a                  | 9         |
